# Supplementary material for: Repeated Anodal Transcranial Direct Current Stimulation (RA-tDCS) over the Left Frontal Lobe Increases Bilateral Hippocampal Cell Proliferation in Young Adult but Not Middle-Aged Female Mice
Source: MDPI journal article supplement (doi:10.3390/ijms24108750), 2023-05-14
Supplement: s1 [file s1]

**Supplementary Materials:** The following supporting information can be downloaded at <https://www.mdpi.com/article/10.3390/ijms24108750/s1>.

**Table S1:** Chi-square test values ( $X^2$ ) as well as significance (p) values obtained regarding the differentiation (in percentages) of newly formed cells that survived in the different regions studied (dHi, vHi) for young adult (2-month-old) and middle-aged (10-month-old) mice. BrdU<sup>+</sup>/NeuN<sup>+</sup>/GFAP<sup>-</sup>, neurons; BrdU<sup>+</sup>/NeuN<sup>-</sup>/GFAP<sup>+</sup>, astrocytes; BrdU<sup>+</sup>/NeuN<sup>-</sup>/GFAP<sup>-</sup>, undifferentiated cells.

|                      | BrdU <sup>+</sup> /NeuN <sup>+</sup> /GFAP <sup>-</sup> |      |           |      | BrdU <sup>+</sup> /NeuN <sup>-</sup> /GFAP <sup>+</sup> |      |             |      | BrdU <sup>+</sup> /NeuN <sup>-</sup> /GFAP <sup>-</sup> |      |           |      |
|----------------------|---------------------------------------------------------|------|-----------|------|---------------------------------------------------------|------|-------------|------|---------------------------------------------------------|------|-----------|------|
|                      | 2 months                                                |      | 10 months |      | 2 months                                                |      | 10 months   |      | 2 months                                                |      | 10 months |      |
|                      | dHi                                                     | vHi  | dHi       | vHi  | dHi                                                     | vHi  | dHi         | vHi  | dHi                                                     | vHi  | dHi       | vHi  |
| <b>X<sup>2</sup></b> | 0.13                                                    | 0.49 | 1.61      | 0.08 | 0.25                                                    | 0.88 | 6.17        | 0.11 | 0.06                                                    | 0.26 | 0.04      | 0.38 |
| <b>p</b>             | 0.72                                                    | 0.83 | 0.20      | 0.77 | 0.62                                                    | 0.35 | <b>0.01</b> | 0.75 | 0.80                                                    | 0.61 | 0.84      | 0.54 |
